# Supplementary material for: Optimization of Synthesis of the Amino Lipid ECO for Effective Delivery of Nucleic Acids
Source: Pharmaceuticals (Basel). 2021 Oct 2;14(10):1016. doi: 10.3390/ph14101016 (PMC8537419; doi:10.3390/ph14101016)
Supplement: Supplementary file 1 [file pharmaceuticals-14-01016-s001.zip › pharmaceuticals-1365220-supplementary.pdf]

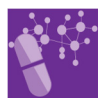

## Supplemental Figures:

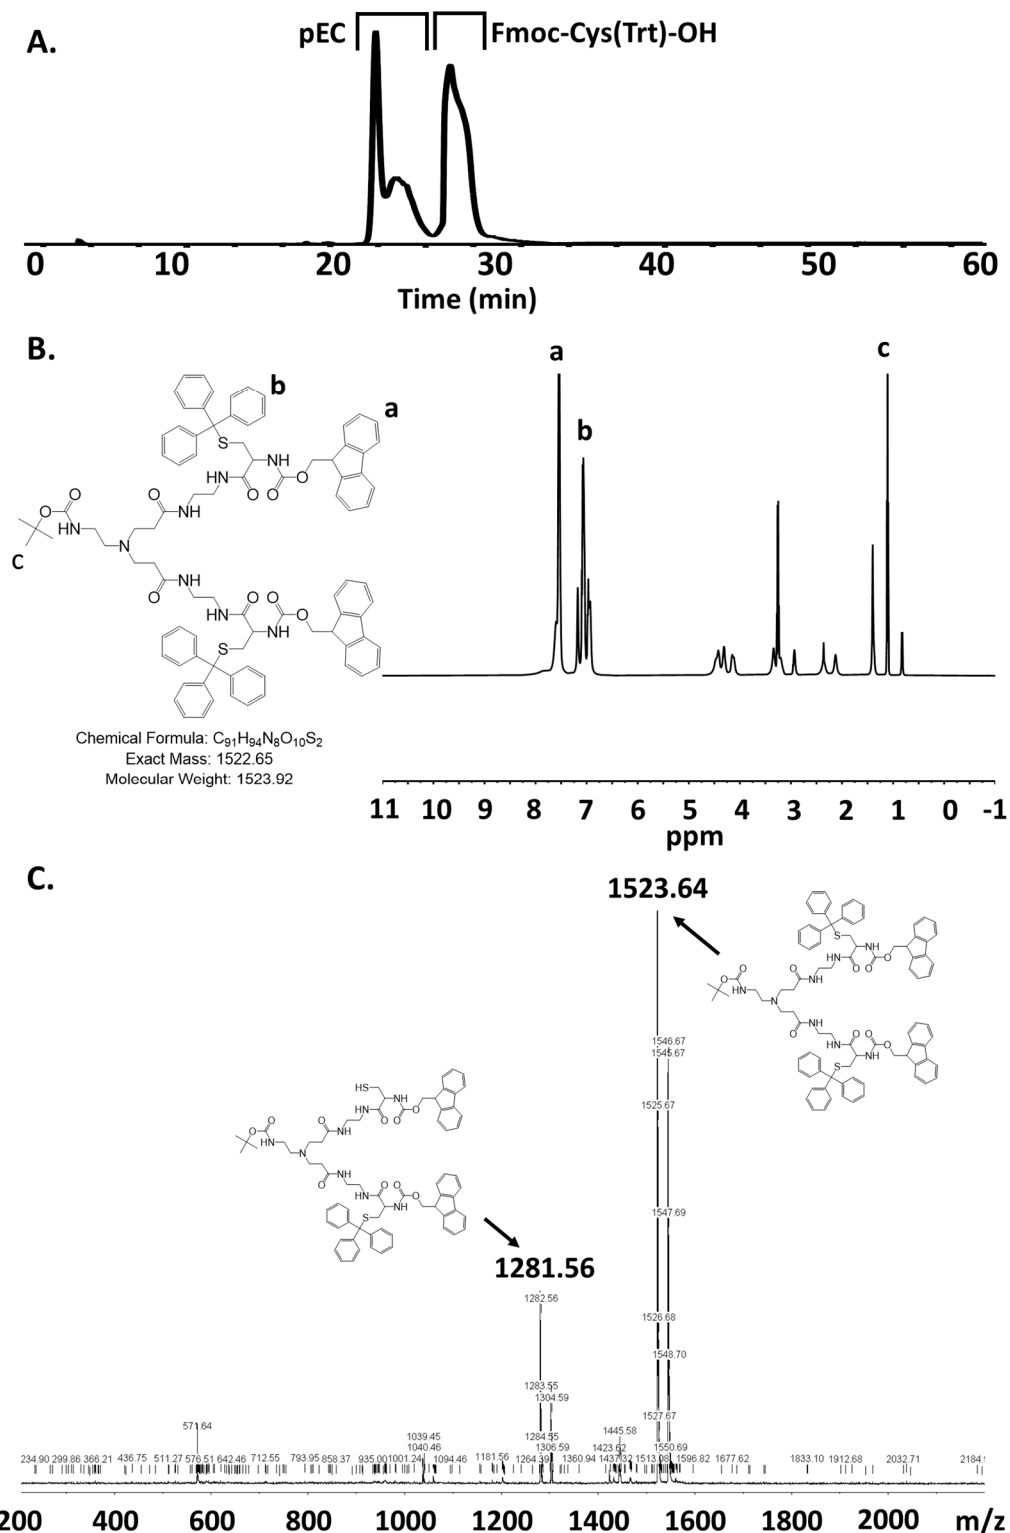

**Figure S1:** Characterization of pEC. A) HPLC analysis at 256nm B)  $^1\text{H}$ -NMR, and C) MALDI-TOF mass spectrum of pEC revealing the presence of Fmoc-Cys(Trt)-OH in addition to pEC.

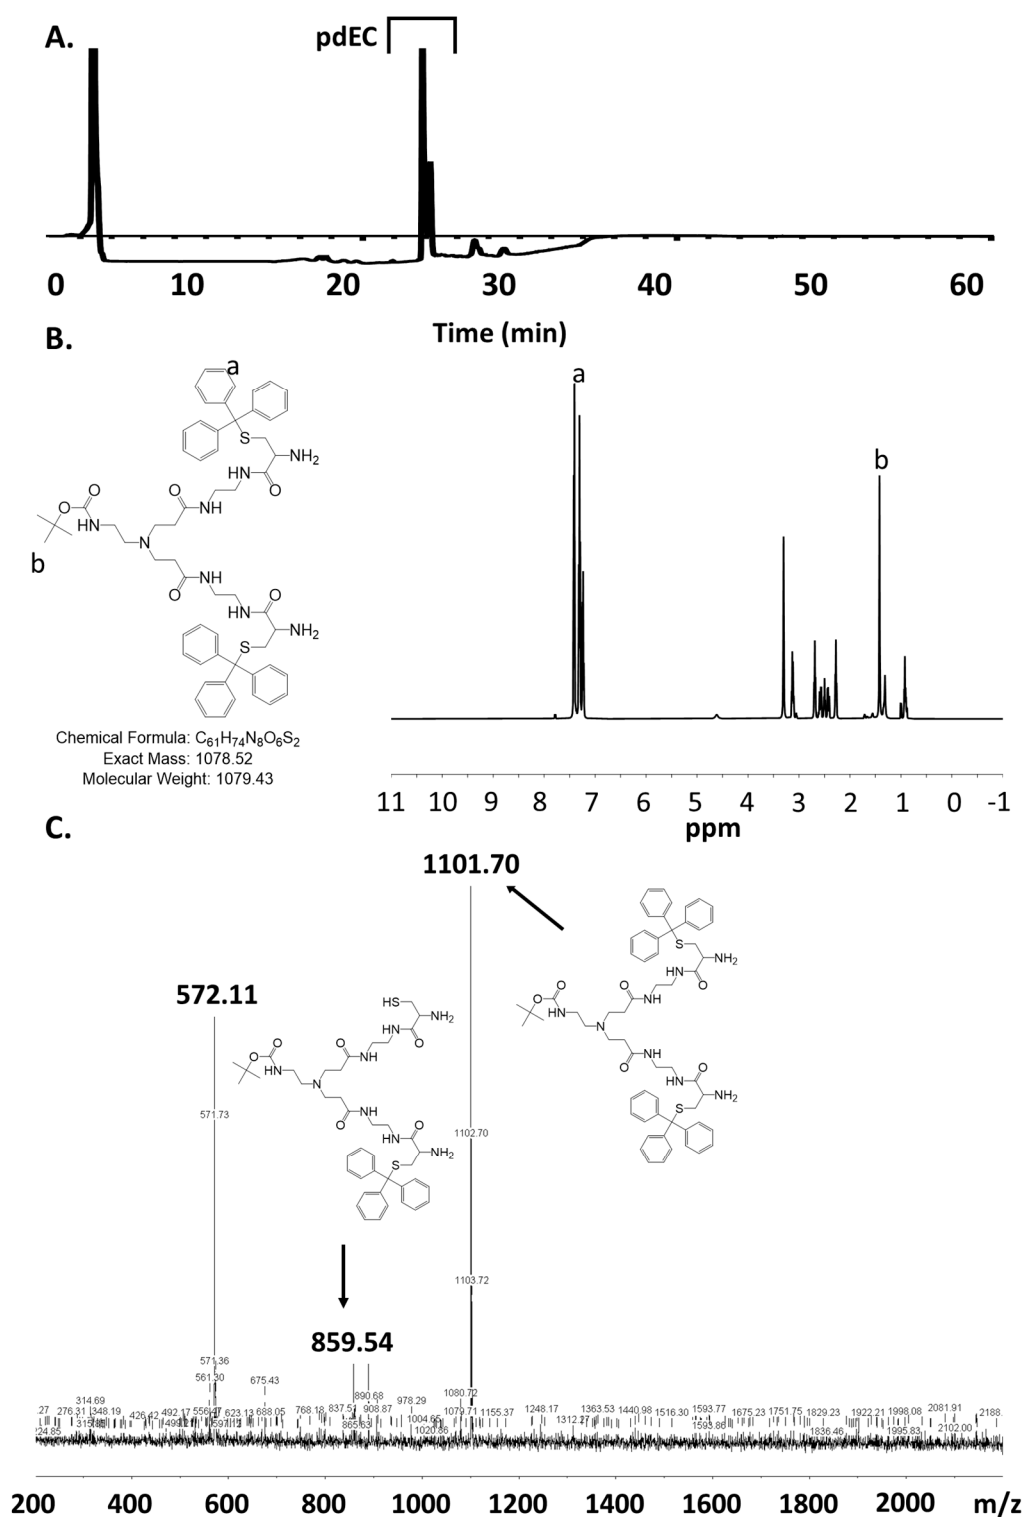

**Figure S2.** Characterization of pdEC. A) HPLC at 256nm analysis B)  $^1\text{H}$ -NMR, and C) MALDI-TOF mass spectrum of pdEC revealing strong pdEC signal with no indication of impurities.

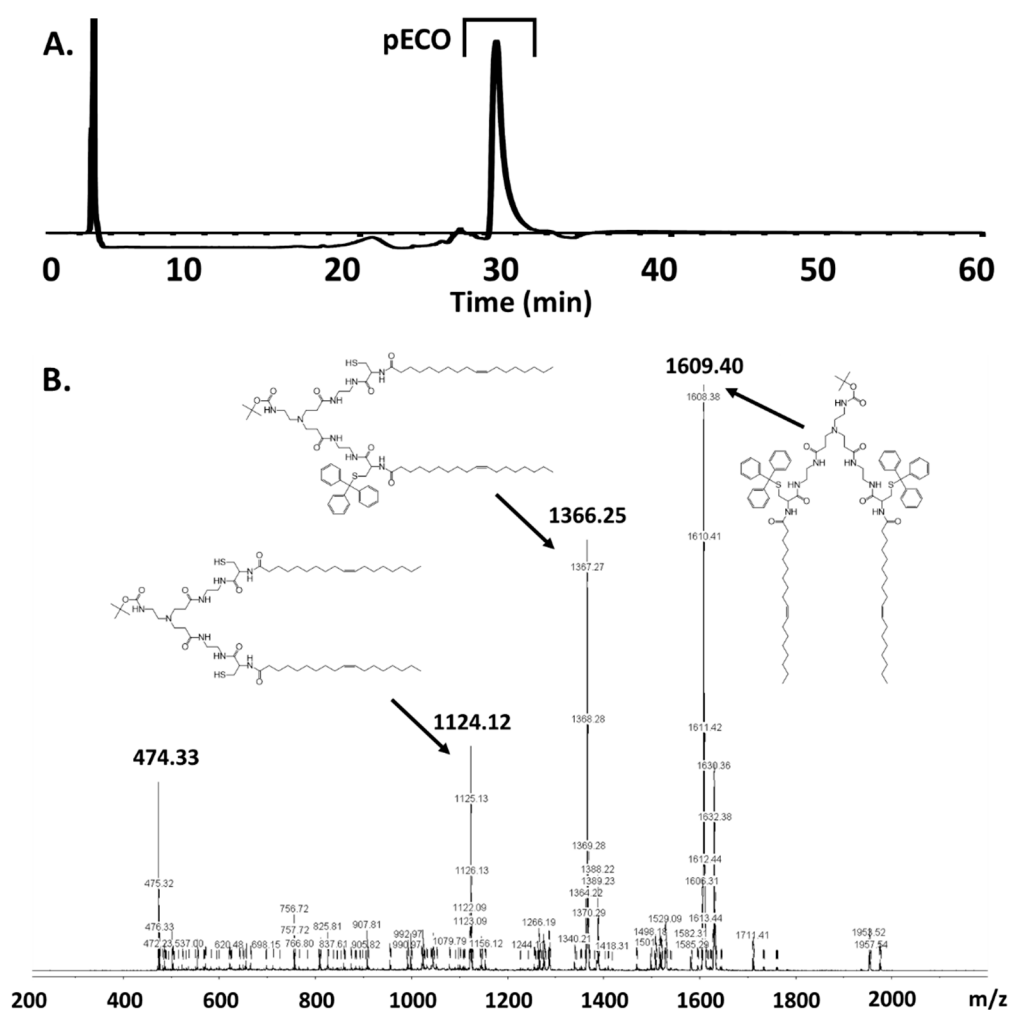

**Figure S3.** Characterization of pECO. **A)** HPLC analysis at 256nm and **B)** MALDI-TOF mass spectrum of pECO showing strong presence of pECO with various partially deprotected pECO.

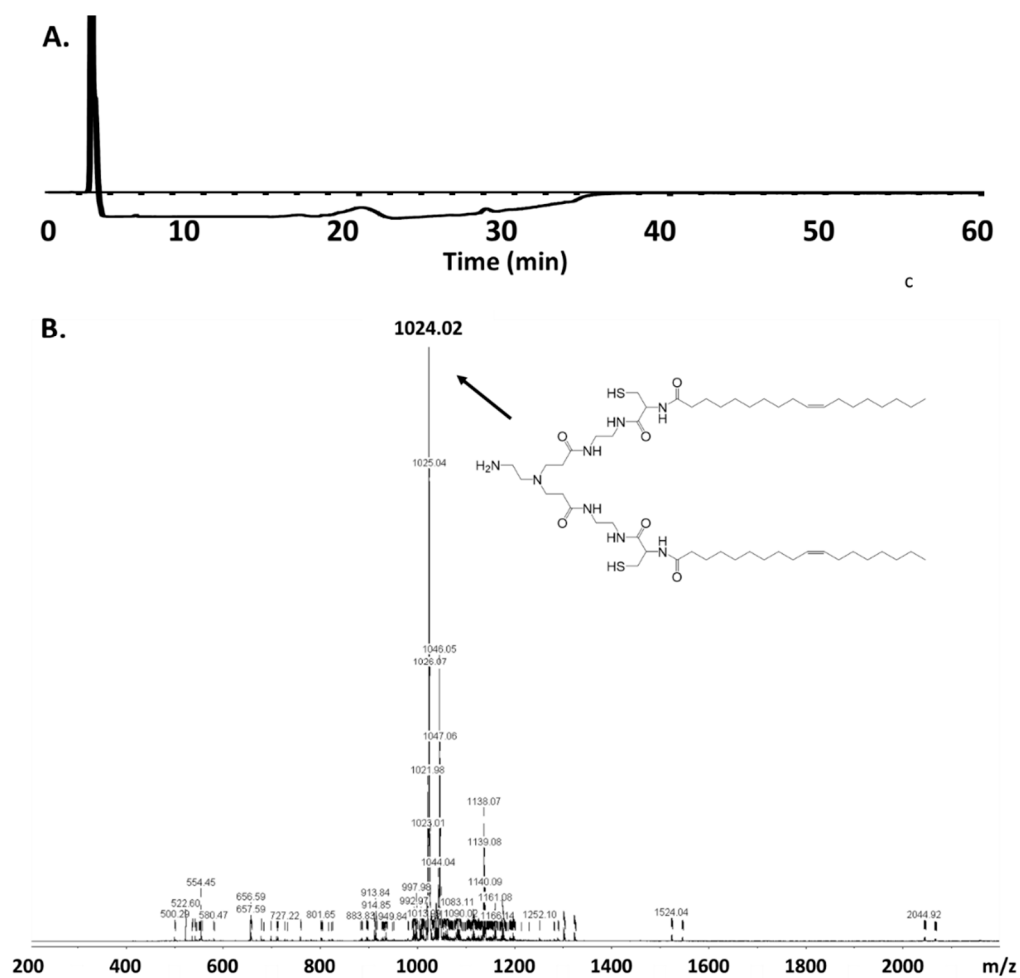

**Figure S4.** Characterization of ECO. A) HPLC analysis at 256nm and B) MALDI-TOF mass spectrum of ECO revealing successful removal of trityl cations and pure ECO.
